# Supplementary material for: Dissecting Regulatory Non-Coding GWAS Loci Reveals Fibroblast Causal Genes with Pathophysiological Relevance to Heart Failure
Source: Research Square preprint supplement (doi:10.21203/rs.3.rs-5837699/v1), 2025-01-21
Supplement: Supplementary file 1 [file 00b5ca6fdf8676cb87e8a363.docx]

# Supplemental Notes

Topologically associating domains (TADs)

In addition to loops, topologically associating domains (TADs) are larger-scale structures often thought of as “local neighborhoods” which constrain interactions between genes and regulatory elements. Hence, we assessed the proportion of our identified SNP-gene pairs where the variant and gene are both contained within the same TAD across various Hi-C resolutions in both NHCFV and HCM cells. The total number of TADs inferred in each cell type varied considerably depending on algorithm and resolution (**Table SN1**). For TADs computed using the directionality index or insulation score, a maximum of 41% of SNP-gene pairs were found within the same TAD, while TADs discovered via the arrowhead algorithm fared slightly better, with a maximum of 63% of SNP-gene pairs falling within the same TAD. In contrast, across all resolutions, the more recently published GRiNCH algorithm1 inferred TADs that *at a minimum* showed 86% of SNP-gene pairs falling into the same TAD.

Notably, the GRiNCH TADs tended to be smaller than those inferred by other tools, and SNP-gene pairs *not* contained within the same TAD were consistently farther apart than those within the same TAD (**Figure SN1**). The full extent of TADs’ practical relevance is debated2, but these findings suggest functionally important TADs may be more readily identifiable by modern methods that utilize smoothing and non-negative matrix factorization, such as GRiNCH. For this reason, we will only present GRiNCH TAD calls in the main results figures, but we will provide results with the other TAD-calling algorithms in Supplemental Figures. Our TAD analyses highlight the importance of applying different methods at various scales on deeply-sequenced Hi-C data, to robustly identify novel regulatory interactions.

**Table SN1:** Number of TADs inferred across different algorithms and resolutions, and proportion of identified SNP-gene pairs falling into the same TAD per parameter choice.

| Cell Type,  Resolution | Arrowhead | | Insulation Score | | Directionality Index | | GRiNCH | |
| --- | --- | --- | --- | --- | --- | --- | --- | --- |
| Total TADs | % Same TAD | Total TADs | % Same TAD | Total TADs | % Same TAD | Total TADs | % Same TAD |
| NHCFV, 5 Kb | 8,476 | 39% | 4,479 | 13% | 8,203 | 19% | 2,519 | 88% |
| NHCFV, 10 Kb | 8,124 | 57% | 2,711 | 19% | 3,865 | 28% | 2,318 | 88% |
| NHCFV, 25 Kb | 4,406 | 63% | 1,518 | 21% | 1,649 | 38% | 1,954 | 88% |
| NHCFV, 50 Kb | 2,148 | 57% | 857 | 13% | 850 | 31% | 1,857 | 87% |
| NHCFV, 100 Kb | 914 | 45% | 470 | 9% | 428 | 38% | 1,511 | 89% |
| NHCFV, 500 Kb | 53 | 11% | 89 | 5% | 81 | 26% | 1,266 | 86% |
| HCM, 5 Kb | 8,688 | 27% | 4,058 | 5% | 8,634 | 19% | 2,645 | 91% |
| HCM, 10 Kb | 8,157 | 48% | 2,556 | 11% | 4,053 | 26% | 2,499 | 91% |
| HCM, 25 Kb | 4,400 | 49% | 1,563 | 14% | 1,670 | 41% | 1,976 | 91% |
| HCM, 50 Kb | 2,109 | 44% | 878 | 13% | 846 | 32% | 1,659 | 92% |
| HCM, 100 Kb | 862 | 40% | 443 | 6% | 409 | 36% | 1,489 | 92% |
| HCM, 500 Kb | 45 | 13% | 89 | 3% | 73 | 22% | 803 | 95% |

HCM: Human cardiac myocytes; NHCFV: Normal human cardiac fibroblasts – ventricular


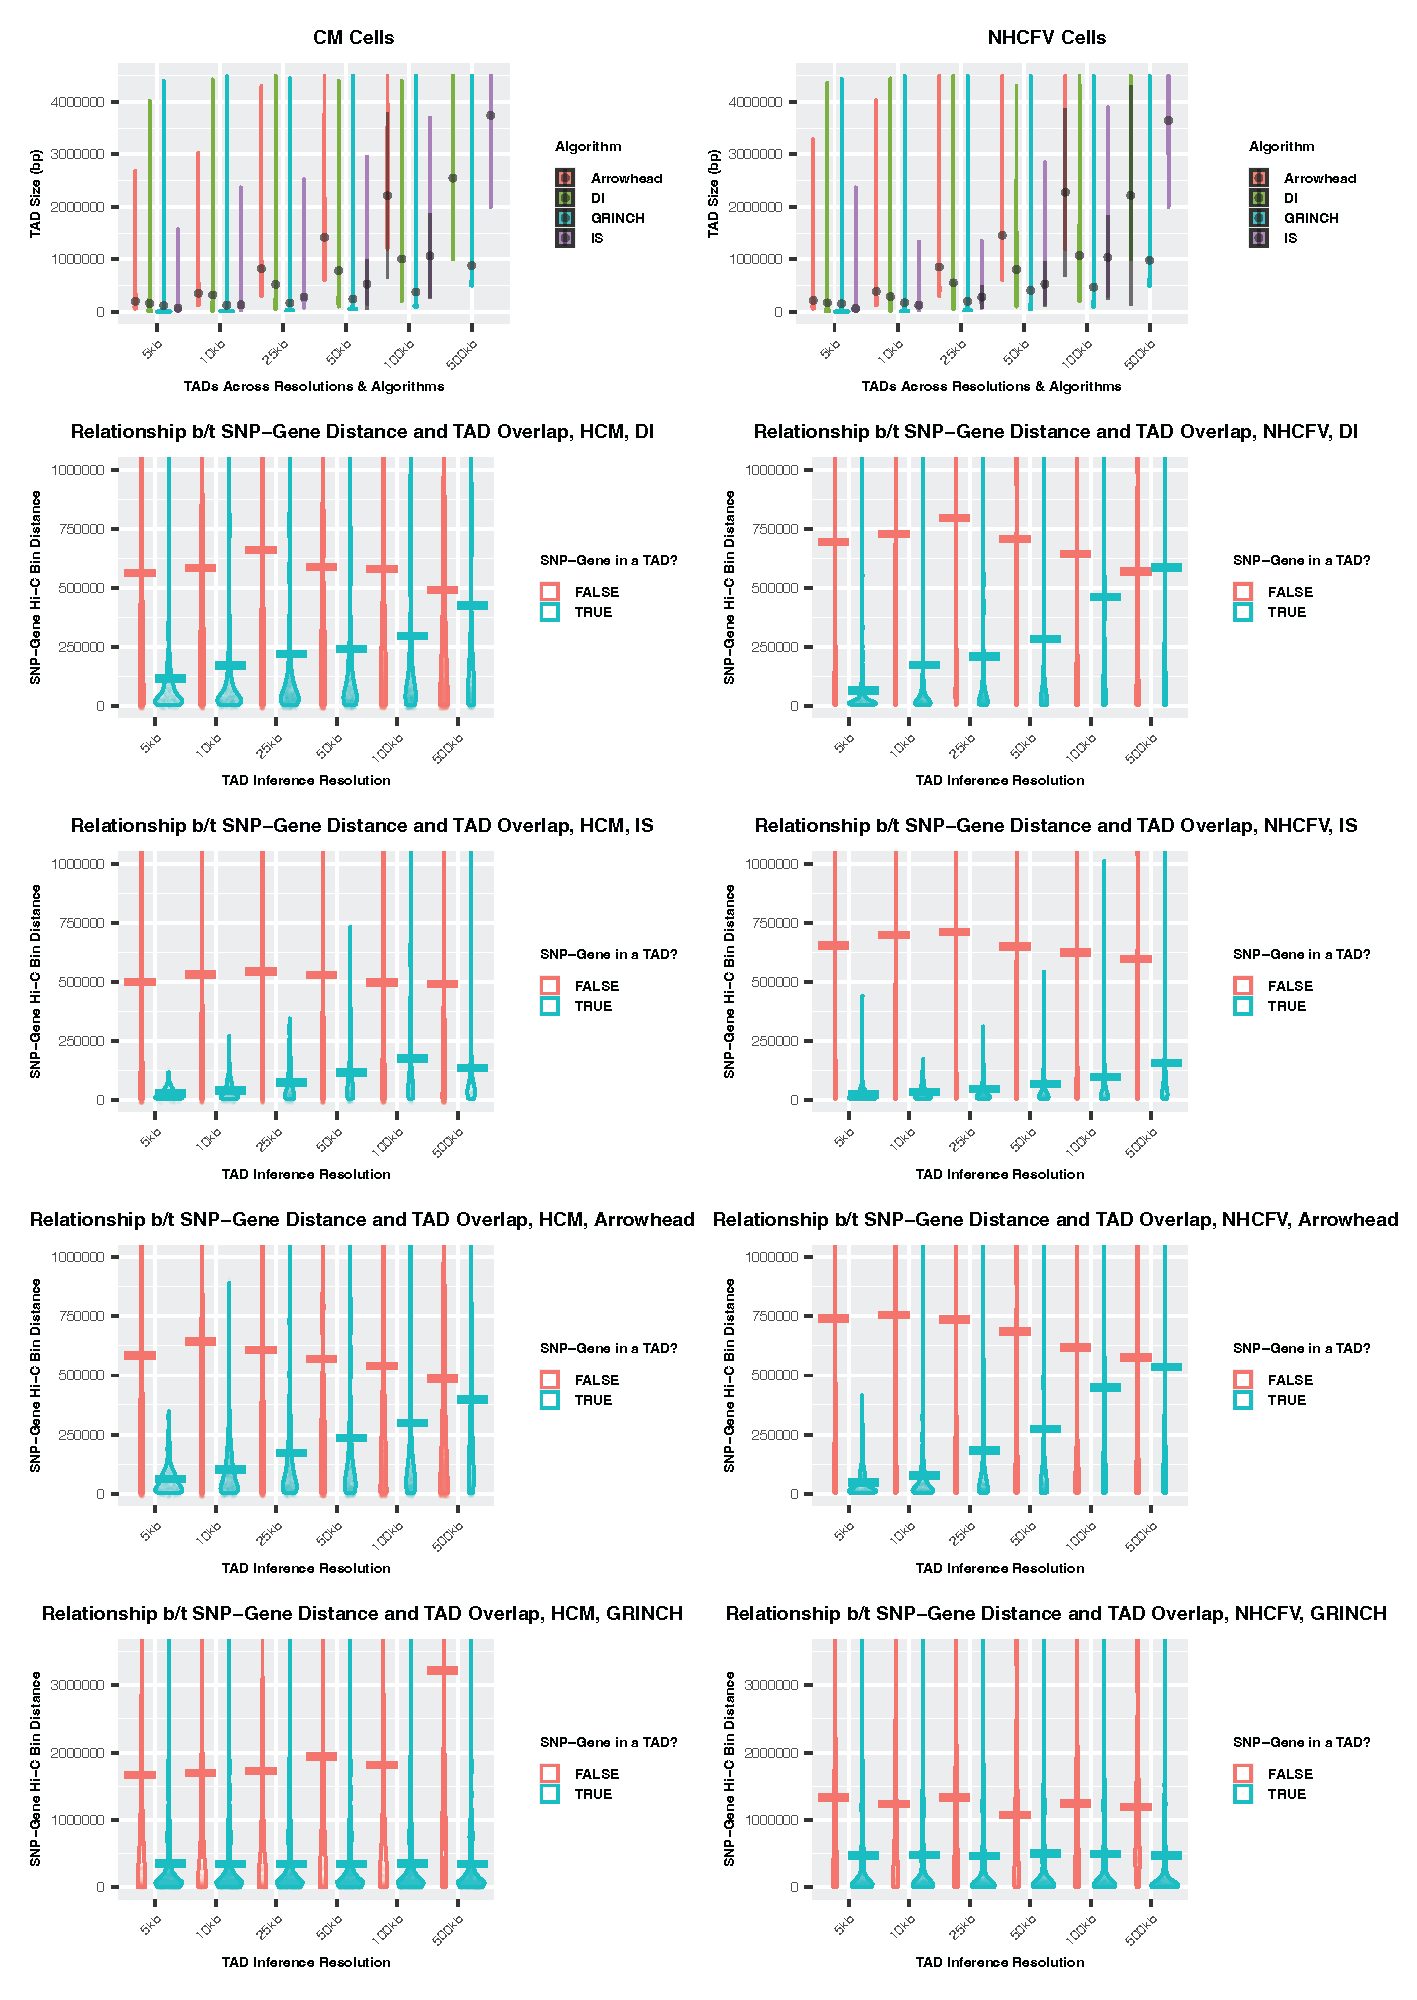


**Figure SN1:** Inter-algorithm examination of TAD sizes and SNP-gene pair distances stratified by TAD inclusion status. **A)** and **B)** show the distribution of TAD sizes inferred across resolutions in HCM and NHCFV cells, respectively, using the four different algorithms applied. Note arrowhead TADs do exist at 500kb resolution but are not visible in this distribution due to their large size (smallest found was 4 Mb). **C)** and **D**) For TADs called in HCM and NHCFV using directionality index (DI), we show distance between the Hi-C bins of an identified SNP-gene pair (y-axis) across different TAD inference resolutions (x-axis), stratified by whether the SNP-gene pair could be found within the same TAD (colors). **E-J)** Similar to a and b, but for insulation score (IS), arrowhead, and GRiNCH-defined TADs, respectively.

Promiscuous SNP-TSS interactions from Hi-C Data

Our high resolution Hi-C data affords us the unprecedented ability to identify direct interactions between individual SNPs (proxies for enhancers and super-enhancers) and TSSs. Our analysis of these data revealed promiscuous interactions between SNP- and TSS-spanning bins (**Figure SN2**). These situations may arise when a SNP bin interacts with multiple bins containing distinct genes’ TSSs (enhancers with multiple target genes) (**Figure SN2A**) or if two or more distinct SNP bins interact with a TSS bin (target genes interacting with multiple regulatory elements) (**Figure SN2B**). More than half (81.4% in HCM and 63.3% in NHCFV) of the SNPs in expressed TFs’ footprints were in loops with more than one target gene, suggesting that the enhancers they perturb may be regulatory hubs affecting multiple target genes. On the other hand, about 30% of HCM and NHCFV expressed genes’ TSSs interacted with more than one SNP in footprints of expressed TFs. These cases may represent multiple perturbations of a single enhancer regulating a target gene, perturbation of two or more distinct enhancers regulating a disease-related target gene, or both.

While these promiscuous interactions appear primarily driven by complex underlying regulatory circuitry, we also encountered ambiguous SNP-TSS pairings, which are primarily driven by technological limitations. Despite the high resolution of our Hi-C data, 2-kb windows are still larger than both SNPs and TSSs (mean length 25.2±21.3 bp and up to 249 bp in the FANTOM5 data). Hence, there will inevitably be cases of bins containing two or more adjacent or overlapping TSSs interacting with SNP-spanning bins, as well as situations where bins spanning two or more indistinguishable SNPs interacting with TSS-overlapping bins:

1. Ambiguous Target Gene (**Figure SN2C**): One-fifth of footprint SNPs interacted with bins containing TSSs of two or more distinct genes (19.7% in HCM and 21.6% in NHCFV).
2. Ambiguous SNP (**Figure SN2D**): Nearly half (46.6% in HCM and 44.9% in NHCFV) of the SNP-gene pairs involved a target gene interacting with more than one SNP.
3. Ambiguous Target Gene Bin (**Figure SN2E**): Cases where gene TSSs span more than one 2-kb bin are not an issue, as they result in redundant interactions but no information loss. These occurred at about 10% frequency in HCM and NHCFV.

**Figure SN2:** Different types of promiscuous SNP-gene interactionsin pairwise Hi-C data. **A)** SNPs interacting with multiple target genes, **B)** Target genes interacting with multiple distinct SNPs, **C)** SNPs with ambiguous target genes, **D)** Target genes interacting with ambiguous SNPs, **E)** Target genes spanning multiple Hi-C bins.

SNP-Gene Pairs and eQTLs

We made note of SNP-gene pairs in which the footprint SNP or a proxy were eQTLs of the target gene. While this represents additional evidence of a regulatory relationship, GTEx eQTLs are based on whole-tissue information and these relationships may not be consistently recapitulated in our regulatory circuits derived from more homogeneous primary cell populations. In addition, GTEx eQTLs were limited to SNPs within 1-Mb of gene TSSs3. It is further worth noting that the utility of eQTL overlap for understanding GWAS signals, regardless of eQTL discovery specifics, may be relatively limited. In addition to the possibility that systematic differences in evolutionary pressures and discovery methods for eQTL and GWAS may preclude holistic overlap4, it is also important to recognize that the measured intermediate molecular phenotype for eQTLs – transcript expression – is not the most downstream effector of biological function (i.e. protein abundance). Indeed, some studies have found surprisingly low overlap (less than or equal to ~50%) between protein quantitative trait loci (pQTL) and eQTL5-7, whereas others have explicitly observed significant buffering effects wherein final protein levels differ substantially from measured transcript levels8-10. Such findings suggest incorporation of further proteomics data could be beneficial for characterizing GWAS hits’ targets and mechanisms of action. Unfortunately, proteomic assays have historically lagged behind transcriptomic assays, but recent technological and methodological advances should enable more comprehensive protein assessments and, consequently, better functional characterization of disease-associated variants11,12.

1 Lee, D.-I. & Roy, S. GRiNCH: simultaneous smoothing and detection of topological units of genome organization from sparse chromatin contact count matrices with matrix factorization. *Genome Biology* **22**, 164, doi:10.1186/s13059-021-02378-z (2021).

2 Eres, I. E. & Gilad, Y. A TAD Skeptic: Is 3D Genome Topology Conserved? *Trends Genet* **37**, 216-223, doi:10.1016/j.tig.2020.10.009 (2021).

3 Consortium, G. T. *et al.* Genetic effects on gene expression across human tissues. *Nature* **550**, 204-213, doi:10.1038/nature24277 (2017).

4 Mostafavi, H., Spence, J. P., Naqvi, S. & Pritchard, J. K. Limited overlap of eQTLs and GWAS hits due to systematic differences in discovery. 2022.2005.2007.491045, doi:10.1101/2022.05.07.491045 %J bioRxiv (2022).

5 Robins, C. *et al.* Genetic control of the human brain proteome. *Am J Hum Genet* **108**, 400-410, doi:10.1016/j.ajhg.2021.01.012 (2021).

6 Sun, B. B. *et al.* Genomic atlas of the human plasma proteome. *Nature* **558**, 73-79, doi:10.1038/s41586-018-0175-2 (2018).

7 He, B., Shi, J., Wang, X., Jiang, H. & Zhu, H.-J. Genome-wide pQTL analysis of protein expression regulatory networks in the human liver. *BMC Biology* **18**, 97, doi:10.1186/s12915-020-00830-3 (2020).

8 Buccitelli, C. & Selbach, M. mRNAs, proteins and the emerging principles of gene expression control. *Nature Reviews Genetics* **21**, 630-644, doi:10.1038/s41576-020-0258-4 (2020).

9 Blevins, W. R. *et al.* Extensive post-transcriptional buffering of gene expression in the response to severe oxidative stress in baker’s yeast. *Scientific Reports* **9**, 11005, doi:10.1038/s41598-019-47424-w (2019).

10 Kusnadi, E. P., Timpone, C., Topisirovic, I., Larsson, O. & Furic, L. Regulation of gene expression via translational buffering. *Biochim Biophys Acta Mol Cell Res* **1869**, 119140, doi:10.1016/j.bbamcr.2021.119140 (2022).

11 Stunnenberg, H. G. & Hubner, N. C. Genomics meets proteomics: identifying the culprits in disease. *Hum Genet* **133**, 689-700, doi:10.1007/s00439-013-1376-2 (2014).

12 Molendijk, J. & Parker, B. L. Proteome-wide Systems Genetics to Identify Functional Regulators of Complex Traits. *Cell Syst* **12**, 5-22, doi:10.1016/j.cels.2020.10.005 (2021).
